# Supplementary material for: DOTA-ZOL: A Promising Tool in Diagnosis and Palliative Therapy of Bone Metastasis—Challenges and Critical Points in Implementation into Clinical Routine
Source: PubMed Central journal article supplement (PMC7412164; doi:10.3390/molecules25132988), 2020-06-30
Supplement: molecules-25-02988-s001.pdf [file molecules-25-02988-s001.pdf]

## Supplementary Materials

# Dota-Zol: A Promising Tool in Diagnosis and Palliative Therapy of Bone Metastasis – Challenges and Critical Points in Implementation into Clinical Routine

Michael Meisenheimer <sup>1</sup>, Stefan Kürpig <sup>1</sup>, Markus Essler <sup>1</sup> and Elisabeth Eppard <sup>2,\*</sup>

- <sup>1</sup> Department of Nuclear Medicine, University Hospital Bonn, D-53127 Bonn, Germany; michael.meisenheimer@ukbonn.de (M.M.); stefan.kuerpig@ukbonn.de (S.K.); markus.essler@ukbonn.de (M.E.)  
<sup>2</sup> Positronpharma SA, Rancagua 878, Providencia 7500921, Chile  
\* Correspondence: eppard@positronpharma.cl

Academic Editor: Diego Muñoz-Torrero

Received: 11 June 2020; Accepted: 19 June 2020; Published: 30 June 2020

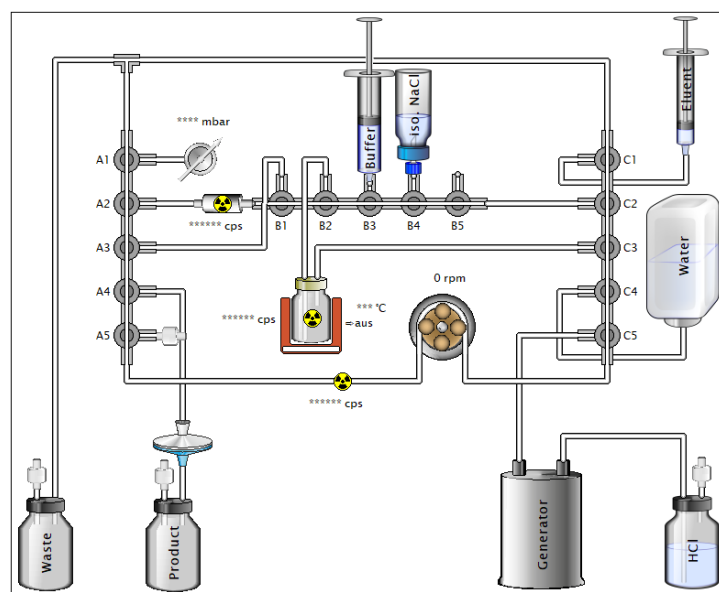

**Figure S1.** Schematic illustration of the fluidic kit setup of the automated synthesis of  $[^{68}\text{Ga}]\text{Ga-DOTA-ZOL}$ .

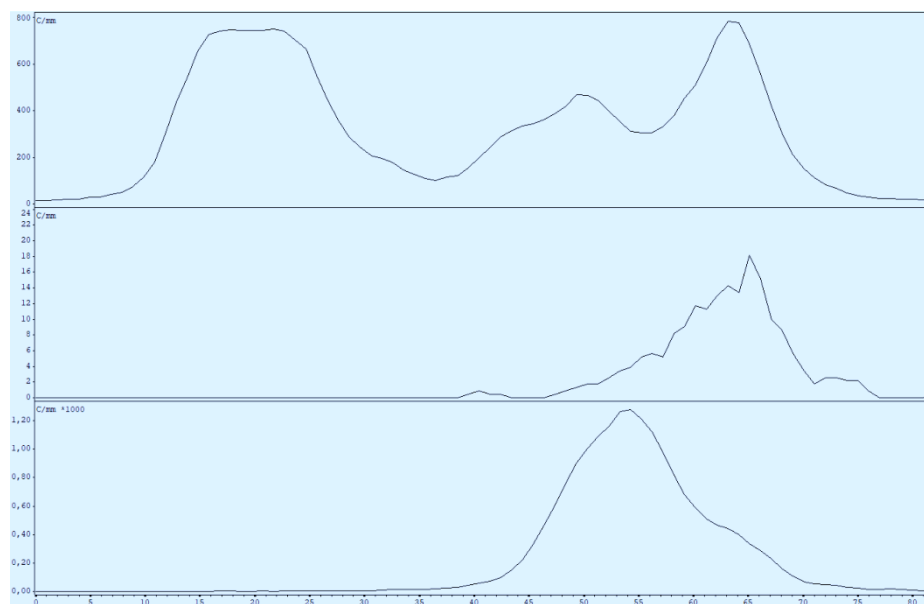

**Figure S2.** Radio-TLC chromatograms of the different species potentially present in a  $[^{68}\text{Ga}]\text{Ga}$ -DOTA-ZOL synthesis developed in acac/ac/conc. HCl (10:10:1) with silica 60 F254 TLC plates as stationary phase. Appearance in the following order: final product of a  $[^{68}\text{Ga}]\text{Ga}$ -DOTA-ZOL synthesis,  $^{68}\text{Ga}$ -colloids,  $[^{68}\text{Ga}]\text{Ga}^{3+}$ .

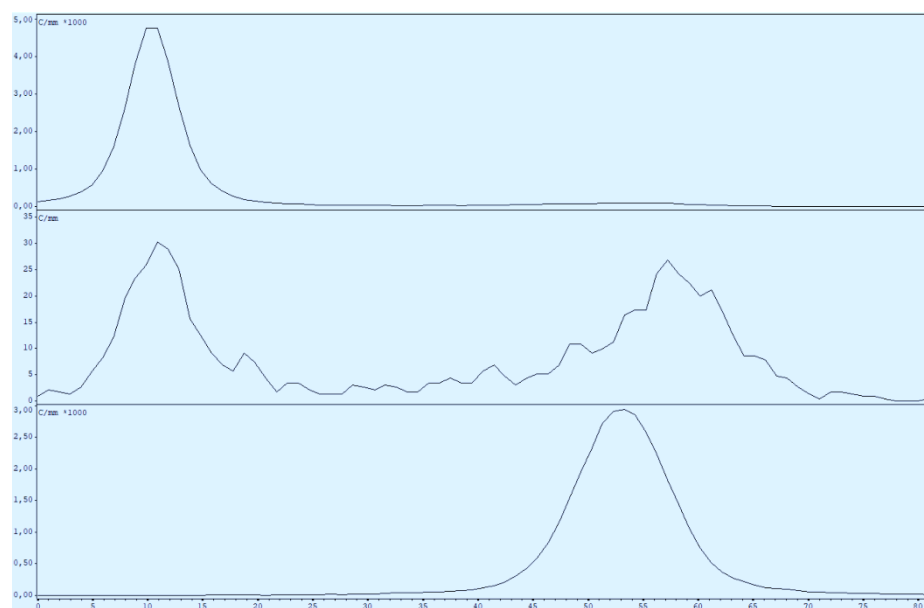

**Figure S3.** Radio-TLC chromatograms of the different species potentially present in a  $[^{68}\text{Ga}]\text{Ga}$ -DOTA-ZOL synthesis developed in acac/ac with silica 60 F254 TLC plates as stationary phase. Appearance in the following order: final product of a  $[^{68}\text{Ga}]\text{Ga}$ -DOTA-ZOL synthesis,  $^{68}\text{Ga}$ -colloids,  $[^{68}\text{Ga}]\text{Ga}^{3+}$ .

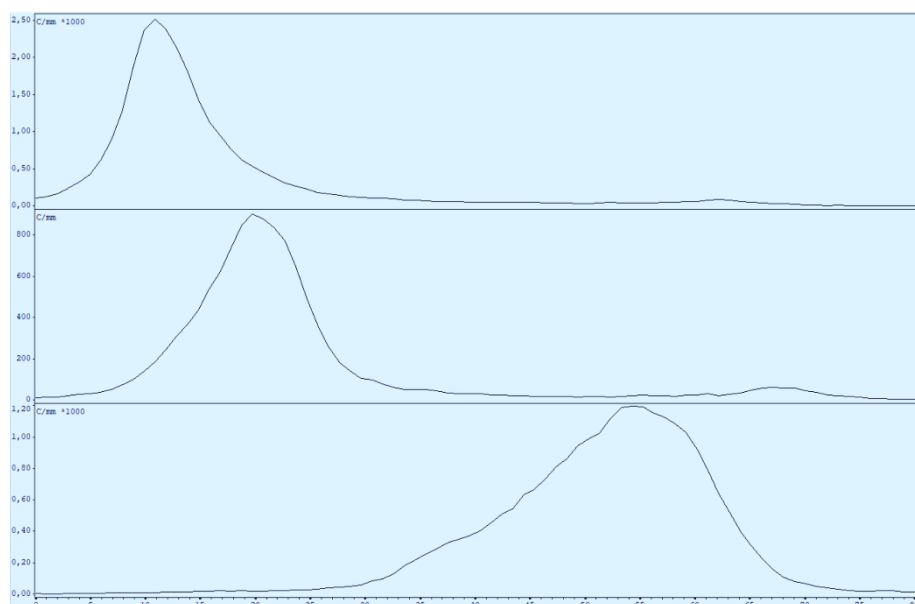

**Figure S4.** Radio-TLC chromatograms of the different species potentially present in a  $[^{68}\text{Ga}]\text{Ga-DOTA-ZOL}$  synthesis developed in citric buffer pH 4 with silica 60 F254 TLC plates as stationary phase. Appearance in the following order final product of a  $[^{68}\text{Ga}]\text{Ga-DOTA-ZOL}$  synthesis,  $^{68}\text{Ga}$ -colloids,  $[^{68}\text{Ga}]\text{Ga}^{3+}$  present as citrate complex.

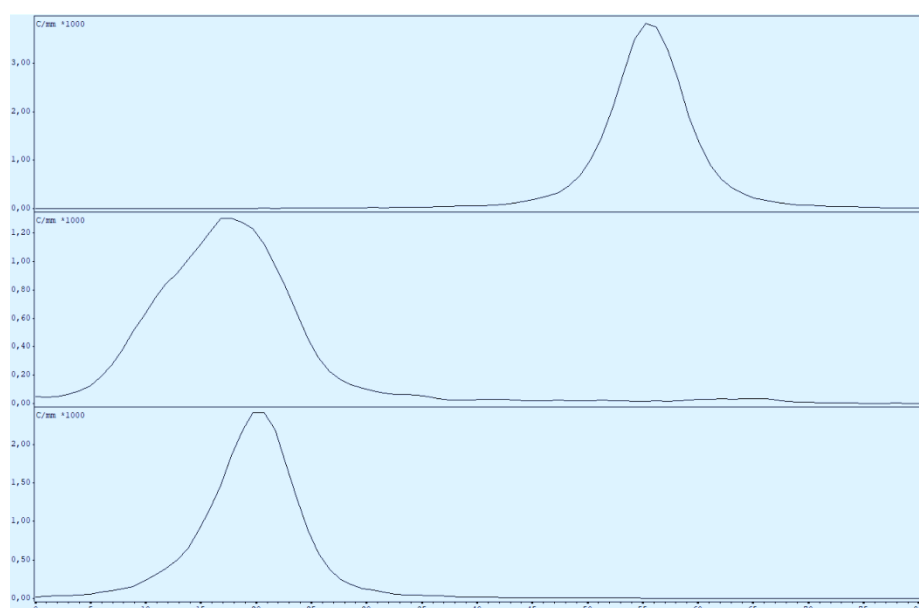

**Figure S5.** Radio-TLC chromatograms of the different species potentially present in a  $[^{68}\text{Ga}]\text{Ga-DOTA-ZOL}$  synthesis developed in TBAP/MeOH (9:1) with silica 60 F254 TLC plates as stationary phase. Appearance in the following order final product of a  $[^{68}\text{Ga}]\text{Ga-DOTA-ZOL}$  synthesis,  $^{68}\text{Ga}$ -colloids,  $[^{68}\text{Ga}]\text{Ga}^{3+}$ .

**Table S1.** List of investigated radio-TLC conditions. Greyed cells represent no single peak or smear of the species.

| Mobile phase | Stationary phase   |                  |                  |                  |                  |                  |
|--------------|--------------------|------------------|------------------|------------------|------------------|------------------|
|              | TLC silica 60 F254 |                  |                  | iTLC SG          |                  |                  |
|              | R <sub>f</sub> A   | R <sub>f</sub> B | R <sub>f</sub> C | R <sub>f</sub> A | R <sub>f</sub> B | R <sub>f</sub> C |
| 0.9% saline  |                    |                  |                  |                  |                  |                  |
| ac           |                    |                  |                  |                  |                  |                  |
| acac         | 0-0.2              | 0.8-1            |                  |                  |                  |                  |

|                           |         |         |         |             |
|---------------------------|---------|---------|---------|-------------|
| acac/ac (1:1)             | 0-0.1   | 0.7-0.8 |         |             |
| acac/ac/HCl (1:1:0.1) [1] |         | 0.6-0.9 | 0.8-1   |             |
| ACN                       |         |         |         | 0-0.2 0.8-1 |
| Citric buffer pH 4        | 0-0.1   | 0.7-1   | 0.1-0.2 |             |
| Citric buffer pH 5        | 0-0.1   | 0.7-1   | 0.1-0.2 |             |
| EtOAc                     |         |         |         |             |
| H <sub>2</sub> O          |         |         |         |             |
| MEK                       |         |         |         |             |
| MeOH                      |         |         |         |             |
| PrOH                      |         |         |         |             |
| TBAP                      | 0.7-1   |         |         |             |
| TBAP/ac (1:1)             |         |         |         |             |
| TBAP/acac (1:1)           |         |         |         |             |
| TBAP/acac (3:1)           |         |         |         |             |
| TBAP/MeOH (9:1)           | 0.7-0.8 | 0.1-0.3 | 0.1-0.2 |             |

A: [<sup>68</sup>Ga]Ga-DOTA-ZOL; B: [<sup>68</sup>Ga]Ga<sup>3+</sup>; C: <sup>68</sup>Ga-colloids.

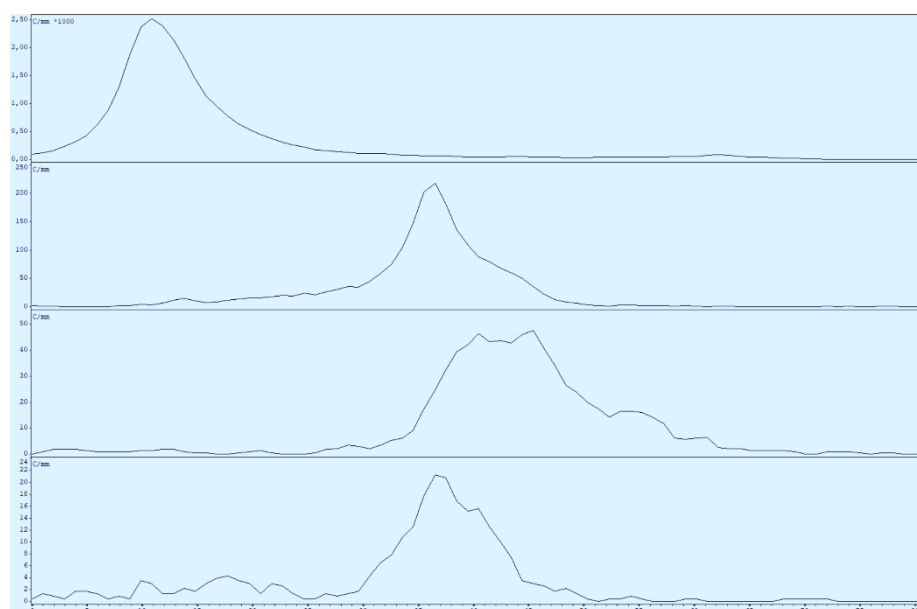

**Figure S6.** Change of composition during incubation in the solvent system of the published radio-TLC method developed in citric buffer pH 4 with silica 60 F254 TLC plates as stationary phase. First row: radioTLC chromatogram of [<sup>68</sup>Ga]Ga-DOTA-ZOL after synthesis. Second row: [<sup>68</sup>Ga]Ga-DOTA-ZOL incubated 5 min in a preparation of acac/ac/conc. HCl (10:10:1). Third row: <sup>68</sup>Ga eluate incubated 5 min in a preparation of acac/ac/conc. HCl (10:10:1). Fourth row: [<sup>68</sup>Ga]Ga-DOTA-TOC (initial complexation rate 98 %) after 5 min incubation in a preparation of acac/ac/conc. HCl (10:10:1).

**Table S2.** List of all evaluated SPE cartridges.

|                | SPE Cartridge               | Size   | Should Retain | Retain | Comments  |
|----------------|-----------------------------|--------|---------------|--------|-----------|
| <b>Agilent</b> |                             |        |               |        |           |
| 1              | Bond Elut SCX               | 500 mg | Ga            | Ga; P  | Dismissed |
| 2              | Bond Elut Certify           | 200 mg | Ga            | -      | Dismissed |
| <b>Grace</b>   |                             |        |               |        |           |
| 3              | Alltech Extract-Clean IC-Ag | 1.5 ml | P             | Ga; P  | Dismissed |
| 4              | Alltech Extract-Clean IC-H  | 0.5 ml | P             | -      | Dismissed |
| 5              | Alltech Extract-Clean IC-OH | 1.5 ml | P             | Ga; P  | Dismissed |

| <b>Macherey-Nagel</b> |                                    |        |    |       |  |                      |
|-----------------------|------------------------------------|--------|----|-------|--|----------------------|
| 6                     | Chromabond HILIC                   | 500 mg | P  | -     |  | Dismissed            |
| 7                     | Chromabond HR-XC                   | 60 mg  | P  | -     |  | Dismissed            |
| 8                     | Chromafix HR-XC                    | S      | P  | Ga; P |  | Dismissed            |
| 9                     | Chromafix C18 ec                   | S      | P  | -     |  | Dismissed            |
| 10                    | Chromafix C4                       | M      | P  | -     |  | Dismissed            |
| 11                    | Chromafix HR-P                     | M      | P  | -     |  | Dismissed            |
| 12                    | Chromafix HR-P                     | L      | P  | -     |  | Dismissed            |
| 13                    | Chromafix HR-XA                    | S      | P  | Ga; P |  | Dismissed            |
| 14                    | Chromafix HR-XAW                   | S      | P  | -     |  | Dismissed            |
| 15                    | Chromafix HR-XAW                   | M      | P  | Ga    |  | Partial purification |
| 16                    | Chromafix PS-Ag <sup>+</sup>       | L      | P  | Ga; P |  | Dismissed            |
| 17                    | Chromafix PS-BA                    | M      | P  | -     |  | Dismissed            |
| 18                    | Chromafix PS-H <sup>+</sup>        | S      | Ga | P     |  | No recovery          |
| 19                    | Chromafix PS-H <sup>+</sup>        | M      | Ga | Ga    |  | Partial purification |
| 20                    | Chromafix PS-H <sup>+</sup>        | L      | Ga | Ga; P |  | Dismissed            |
| 21                    | Chromafix PS-OH-                   | M      | P  | Ga; P |  | Dismissed            |
| 22                    | Chromafix SA                       | M      | P  | Ga    |  | Partial purification |
| 23                    | Chromafix SB                       | M      | P  | Ga; P |  | Dismissed            |
| <b>Waters</b>         |                                    |        |    |       |  |                      |
| 24                    | Sep-Pak Alumina N Plus             | 280 mg | P  | -     |  | Dismissed            |
| 25                    | Sep-Pak C18 Plus                   | 360 mg | P  | Ga; P |  | Dismissed            |
| 26                    | Sep-Pak C18 Plus Light             | 130 mg | P  | -     |  | Dismissed            |
| 27                    | Sep-Pak Accell Plus QMA Plus       | 360 mg | P  | -     |  | Dismissed            |
| 28                    | Sep-Pak Accell Plus QMA Plus Light | 130 mg | P  | -     |  | Dismissed            |
| 29                    | Sep-Pak Silica Plus                | 690 mg | P  | -     |  | Dismissed            |
| 30                    | Sep-Pak Silica Plus Light          | 120 mg | P  | -     |  | Dismissed            |
| 31                    | OASIS MCX 3 cc Vac                 | 60 mg  | P  | -     |  | Dismissed            |
| 32                    | OASIS MCX 6 cc Vac                 | 150 mg | P  | -     |  | Dismissed            |
| <b>Phenomenex</b>     |                                    |        |    |       |  |                      |
| 33                    | Strata SCX                         | 200 mg | Ga | Ga; P |  | Dismissed            |
| 34                    | Strata-X-C                         | 200 mg | P  | -     |  | Dismissed            |
| 35                    | Strata-X-C polymeric               | 200 mg | P  | P     |  | No recovery          |

P: [<sup>68</sup>Ga]Ga-DOTA-ZOL.**Table 3.** List of investigated radio-HPLC conditions. Greyed cells represent no successful discrimination.

| Mobile Phase                                                                                                                    | Column |   |   |   |   |   |   |   |   |   |   |
|---------------------------------------------------------------------------------------------------------------------------------|--------|---|---|---|---|---|---|---|---|---|---|
|                                                                                                                                 | A      | B | C | D | E | F | G | H | I | J | K |
| TBAP <sup>a</sup>                                                                                                               |        |   |   |   |   |   |   |   |   |   |   |
| TBAP/MeOH 95:5 <sup>a*</sup>                                                                                                    |        |   |   |   |   |   |   |   |   |   |   |
| TBAP/MeOH 90:10 <sup>a*</sup>                                                                                                   |        |   |   |   |   |   | ✓ |   |   |   |   |
| TBAP/MeOH 85:15 <sup>a*</sup>                                                                                                   |        |   |   |   |   |   |   |   |   |   |   |
| TBAP/MeOH 75:25 <sup>b*</sup>                                                                                                   |        |   |   |   |   |   |   |   |   |   |   |
| 100 mM Na <sub>3</sub> PO <sub>4</sub> /100 mM Na <sub>3</sub> C <sub>6</sub> H <sub>5</sub> O <sub>7</sub> pH 4.5 <sup>c</sup> |        |   |   |   |   |   |   |   |   |   |   |
| 10 mM TBA-citrate pH 4.5/ACN <sup>d</sup>                                                                                       |        |   |   |   |   |   |   |   |   |   |   |
| 100 mM TEAP pH 2.24 <sup>a</sup>                                                                                                |        |   |   |   |   |   |   |   |   |   |   |
| 0.1 % TFA in H <sub>2</sub> O/0.1 % TFA in ACN <sup>e</sup>                                                                     |        |   |   |   |   |   |   |   |   |   |   |
| 0.1 % TFA in H <sub>2</sub> O/0.1 % TFA in ACN <sup>f</sup>                                                                     |        |   |   |   |   |   |   |   |   |   |   |

<sup>a</sup>isocratic, flow 0.5; 0.7; 1; 1.2 (in 15 min) and 1.5 ml/min; in 25 min. <sup>b</sup>isocratic, flow 0.7; 1 and 1.2 ml/min; in 25 min. <sup>c</sup>gradient A:B (0:100) → A:B (0:100) in 30 min, flow 0.7; 1.2 ml/min, (provided by ITG, Germany). <sup>d</sup>gradient A:B (70:30) → A:B (20:80) in 30 min, flow 0.7; 1.2 ml/min, (provided by ITG,

Germany). °gradient A:B (95:5) → A:B (20:80) in 25min, flow 0.7; 1.2 ml/min [1] †gradient A:B (100:0)  
→ A:B (0:100) in 20min → A:B (50:50) from 20 to 25min, flow 0.7 ml/m.in
